# Supplementary material for: Genome-Wide Identification, Expression and Potential Function Analysis of the ERF and DREB Subfamily Members in Tomato
Source: Research Square preprint supplement (doi:10.21203/rs.3.rs-126159/v1), 2020-12-15
Supplement: Supplementary file 1 [file 98fec08fe28f5fcd7597a5b6.xlsx]

## Sheet: Sheet1
Data S1. The TPM mean value of 60 DREB and 80 ERF genes in 30 tomato organs
Gene name	Gene ID	young stamens	mature anthers	mature carpels	young carpels	styles	ovaries	young petals	mature petals	young sepals	mature sepals	mature flower	green pulps	red pulps	floral meristems	meristems after transitioning to flowering	vegetative meristems	green intermediate seeds	green large seeds	red seeds	young seeds	dry seeds	cotyledons	hypocotyl	leaf laminas	leaf veins	young leaves	senescent leaves	root apexes	root without apexes	internodes
SlERF3-7	Solyc03g026280.3.1	0.185302	16.6021	0.329163	0.651293	8.42882	0.164104	1.55289	49.3798	12.9295	37.2535	2.31677	1.55273	6.14782	0.115218	10.9345	0.149708	0.079982	0.0427645	4.85228	0.145324	1.10139	123.019	95.6977	104.25	15.2014	0	3.55655	11.1737	10.3845	35.4565
SlERF3-22	Solyc03g124110.2.1	0	14.4879	0.307777	0	5.85668	0.176849	1.96053	19.5025	4.50779	15.1654	1.06907	0.176727	1.58419	0.030205	10.706	0.049099	0	0	1.75865	0	0.455827	11.6678	9.69343	19.176	5.23619	0	0.510793	3.60905	2.8701	11.3181
SlERF3-6	Solyc03g026270.3.1	0	3.07026	0	0.0784475	4.41889	0	0.242155	2.3544	2.26793	10.9037	0.300587	0.111566	0.454271	0.050584	1.45578	0	0.0936375	0.030793	0.263963	0.0570715	0.108604	2.87373	10.8928	17.0178	16.5552	0	0	0.541805	0.81739	30.2332
SlERF8-2	Solyc08g007820.1.1	1.04419	3.18269	3.0264	2.58962	2.43781	3.02561	3.70422	13.554	3.39771	10.4514	3.97759	1.69452	2.2791	3.70701	6.46401	4.48584	0.342469	0.0570195	1.14646	1.05563	0.6384	8.37148	9.91197	8.86944	8.58043	6.20439	2.71472	1.48049	0.890343	5.34457
SlERF8-3	Solyc08g007830.1.1	0	2.22426	0.0590545	0	0.524838	0.108658	0.839198	19.1028	0.513317	6.54472	0.556906	0	0	0	1.82675	0.115514	0	0	0	0	0.039565	3.19966	1.43343	1.01695	0.938966	0	0	0.860727	0.496833	0.256243
SlERF12-11	Solyc12g056430.1.1	0.210078	0	0	0	0	0.066003	0	0.0565925	0	0	0.300699	0	0	0	0	0	0	0	0	0	0.0623425	0	0	0	0	0	0	0	0	0
SlERF1-3	Solyc01g009440.3.1	6.05313	0	0	0.442455	0	0.322047	0	0	0	0	0	0	0	0.048608	0.042937	0.265321	0.139725	0.0591805	0	0	0	0.070437	0	0	0	0	0	0	0	0
SlERF9-1	Solyc09g009240.1.1	0	0	0	0	0	0	0	0	0	0	0	0	0	0	0	0	0	0.063126	0	0	0	0	0	0	0	0	0	0	0	1.04478
SlERF10-9	Solyc10g083560.1.1	0.0787675	0	0.0942795	0	0	0	0	0	0	0	0	0	0	0	0	0	0	0	0	0	0.13119	0	0	0	0	0	0	0	0	0.361788
SlERF6-1	Solyc06g035700.1.1	0.076071	2.23064	0.451757	0	0.952672	0.332765	0.822424	7.80069	3.48906	25.4481	3.41717	0.235474	0.095303	0.064811	6.71662	0	0	0	0.108281	0.180955	0	25.721	34.775	6.09001	10.9931	0	0	7.27286	6.2422	4.1228
SlERF8-4	Solyc08g007840.3.1	0	0	0	0	0	0	0	0.055505	0	0.320321	0	0	0	0	0.091599	0	0	0	0	0	0	0	0.218127	0	0	0	0	0.083179	0	0
SlERF8-12	Solyc08g080290.4.1	0.0625265	13.5763	0.041435	0.0368755	1.13047	0.2491	0.381202	1.263	2.28972	3.32791	0.59882	0	0.0287185	0.0475555	1.04182	0.0648935	0	0	0	0.0395885	0.022227	0.757009	0.995228	0.220519	5.26276	0.141299	0	1.28157	2.03554	0.910993
SlERF3-20	Solyc03g120840.3.1	0.815301	40.9754	4.19587	4.99988	0.553744	2.57562	5.43376	12.8809	2.89083	2.71876	5.69465	9.91334	4.67022	22.0495	13.0674	17.7117	2.41606	3.65071	0.0622455	1.23015	1.30823	3.75278	16.8791	3.97581	16.2828	34.5755	11.2353	1.09691	1.16012	35.478
SlERF6-8	Solyc06g066540.1.1	10.8444	1.91209	2.03157	3.0383	1.25418	0.435619	3.87233	0.428958	12.081	1.77992	6.7436	1.51928	0.288118	0.799417	4.16942	0	0.052352	0.347665	0.401405	0.598368	1.93325	7.97346	31.3359	1.88359	1.92098	0.08403	0.784816	1.00073	1.24178	24.3083
SlERF12-9	Solyc12g044390.3.1	1.52296	0.135842	0.17774	0.158181	1.35698	0.1415	0.635601	1.88076	0.228168	0.603862	0.894702	1.0324	0.123191	0.101998	0.412696	0	0.104382	0.0757145	0.191513	1.07902	0.0953445	7.88381	1.17976	1.75218	2.47344	0.907925	1.04336	0	0.856641	0.921692
SlERF8-6	Solyc08g066660.1.1	0.107395	0.084342	0.143552	0	0	0	4.56528	0.993254	2.48323	2.0814	1.77138	0	0	3.44094	6.01553	0.962492	0.084687	0.318568	2.07246	0.203902	1.06318	2.5323	14.9433	0.660583	2.33337	6.57915	0	2.37653	3.2401	3.12942
SlERF12-2	Solyc12g008350.3.1	6.15827	0.837086	9.58747	1.66066	0.739239	0.30632	3.43862	1.61936	2.96503	2.23613	1.4766	10.1403	7.73628	2.72195	2.8641	0.921671	0.217912	0.123872	1.04749	0.655853	3.79471	2.74918	13.8462	1.86115	8.76186	1.18863	0.295143	3.36306	3.48957	4.47432
SlERF1-13	Solyc01g090560.4.1	1.50556	0.93774	0.908016	2.36853	1.68008	0.99924	0.916003	3.04387	3.06034	2.54834	3.08009	0.149786	0	1.49562	3.19656	2.21491	0.119224	0.0120115	0.0370475	2.37293	0	1.9033	12.1223	0.962955	2.96608	1.49192	0.239075	11.611	10.9942	3.70496
SlERF5-5	Solyc05g050830.3.1	24.3226	5.68771	11.7874	7.17917	10.8218	2.28562	2.65177	17.6138	7.67528	2.62474	5.88061	14.8586	0.150952	0.259549	0.390858	0.113122	0.0372355	0	0	1.52196	0	2.40413	0.39796	2.44424	1.72956	0.0538305	0.187269	0.383393	0.766644	0.535928
SlERF8-10	Solyc08g078410.2.1	1.67303	0.477774	0.109886	0.406898	0	0.109259	0.129449	0.684581	3.84098	0.795763	1.90431	0	0	0.0787575	0.080203	0	0	0	0	0	0.0477435	0.367142	0.337084	0.095595	1.09948	0	0.0667135	1.52174	0.495677	3.58444
SlERF8-11	Solyc08g078420.2.1	4.87276	3.05761	0.063158	0.397729	0	0.139568	1.9659	2.67485	18.2642	2.54226	1.81121	0.039969	0	0.0444595	0.453218	0	0	0	0	0.484615	0	1.46269	3.40983	1.14616	6.45991	0	0.382422	1.86046	3.39237	3.60814
SlERF11-5	Solyc11g042560.1.1	0	0	0	0.136763	0	0	0.213031	0	2.48401	0.092389	0.39983	0.075399	0	0	0.060395	0.21257	0.0699705	0	0.11423	0.113835	0	0.758607	0.661547	0.717278	0.901211	0	0.120236	0.622597	0.0940265	1.01319
SlERF11-6	Solyc11g042580.1.1	0	0	0	0	0	0	0	0	0	0	0	0	0	0	0	0	0	0	0	0	0	0	0	0	0	0	0	0	0	0.388673
SlERF2-10	Solyc02g093130.3.1	65.461	136.865	105.659	89.916	116.635	102.465	61.285	231.403	98.6747	228.4	69.5605	135.182	143.291	73.6036	75.4261	65.9373	53.4494	23.3492	72.3484	46.5877	93.2375	79.8568	178.927	103.35	109.26	85.7209	170.15	145.368	147.238	137.922
SlERF4-10	Solyc04g078640.3.1	6.2857	105.198	18.275	11.3671	56.3833	37.967	7.4926	154.7	5.26049	23.7803	7.08246	311.613	156.191	0.11564	1.94208	0.954194	97.953	182.811	96.679	19.917	258.36	41.6549	26.7073	84.9043	15.111	0.13947	146.124	80.7852	79.6186	27.8726
SlERF7-1	Solyc07g042230.1.1	0	0.0899645	0	0	0.180284	0.093957	0.24465	7.08627	0.265335	5.43546	0.331411	0	0.196044	0.472374	0.184934	0.541133	295.848	485.93	111.027	26.1036	326.382	0.918226	0.400301	0.166913	0.320131	0.216589	0.514895	0	0	0.85986
SlERF11-4	Solyc11g012980.1.1	0.742172	0.060484	0.554245	1.45146	0	1.08697	1.06641	0.293071	4.11932	0.464676	1.53352	0.0648385	0.419751	0.09083	0.464569	0.247891	0.451439	0.521899	0.492841	0.687529	0.54726	0.930683	1.2608	0.85627	2.34238	0.20185	0.156805	11.0247	5.86184	1.44035
SlERF1-5	Solyc01g057080.1.1	0	0	0	0	0	0	0	0	0	0	0	0	0	0	0	0	0	0	0	0	0	0	0	0	0.24515	0.296903	0	0	0	0
SlERF6-5	Solyc06g054630.3.1	0	0	0	0.080293	0.098865	0.694796	0.62535	0.08715	0.386215	1.3535	0.0605805	0	0	0.178762	0.420534	0.219104	0	0	0.0670645	0.112076	0	1.37433	0.219519	0.293025	0.098071	0	0.0705905	0.064397	0.0552025	0
SlERF12-3	Solyc12g009240.1.1	0.46108	18.6327	12.0198	11.3986	159.077	0.296436	8.35833	32.5331	112.088	86.2258	54.4338	9.93874	30.7744	18.4917	87.3711	36.2328	0.418263	0.0228165	10.1548	0.168981	0.836005	296.695	208.967	52.875	10.9234	0.111134	4.1484	32.7559	29.4005	83.048
SlERF10-4	Solyc10g076370.3.1	0.208049	0.0118375	0.268649	0.106934	0.118608	0.312685	0.304453	0.209093	0.582726	0.342126	0.0572325	0.222475	0.379339	0	0.0340305	0	0.314395	0.135271	0.575002	0.754937	0.311455	0.244033	0	0.102443	0	0	2.96521	0.478637	0.0794715	0.090512
SlERF10-5	Solyc10g076380.2.1	0	0	0	0	0	0	0	0.053445	0.027166	0	0	0.096074	0	0	0	0	0	0.014776	0	0	0	0	0	0	0	0.03606	0	0	0	0
SlERF10-7	Solyc10g080310.3.1	0.362923	0.16099	0.844777	0.799287	0.301165	1.12682	0.094613	0.0701115	0.832259	0.28237	0.296525	0.144449	0.350816	1.1815	0.902598	0.854094	0.255284	0.168224	1.07964	0.330496	2.21365	0.639904	0.179082	0.577329	0.286434	1.35814	1.34834	0.514	0.569351	0.0887625
SlERF4-4	Solyc04g050750.2.1	0	0	0	0	0	0	0	0	0	0	0	0	0	0.0787575	0.129411	0.35233	170.74	161.087	38.3197	1.89839	177.679	0	0	0	0	0	0.133427	0	0	0
SlERF4-11	Solyc04g080910.1.1	0	0	0	0.149945	0	0	0	0	0	0	0	0.041333	0.055115	0	0	0	64.2791	18.0193	0.735353	46.1751	8.97551	0	0	0	0.036175	0	0	0	0	0
SlERF5-11	Solyc05g052410.3.1	0.940098	5.37417	2.10067	2.43373	32.9921	2.25822	1.39153	13.7311	3.37619	8.69088	2.41315	3.77463	32.4739	1.07924	2.35319	1.31776	15.6051	4.42348	36.3884	2.05378	235.552	9.21789	6.42382	6.19491	4.90823	0.990069	9.69706	1.15233	0.871445	4.89149
SlERF6-2	Solyc06g050520.3.1	0.667406	0.839054	0.407958	0.462491	1.33354	0.39002	0.616016	1.79525	1.21958	1.32235	0.724159	2.89249	7.55102	0.416314	0.663602	0.272623	21.1676	9.23019	32.7294	4.35501	74.1348	0.863736	0.546282	0.885141	0.145049	0.0846255	3.40431	0.168318	0.0434545	0.0567445
SlERF3-14	Solyc03g116610.3.1	85.3163	0.028772	0.241013	2.68317	0.479026	2.43911	4.30002	0.210742	17.6215	9.17129	4.13757	0	0	1.08883	4.86243	2.1677	0	0	0	0	0	1.54193	2.15386	0.413773	0.183426	0.608872	10.692	0	0	0.331881
SlERF12-4	Solyc12g009490.3.1	0.045548	0	0.059401	0.137177	0	0	1.05302	0.294295	0.882174	0.052437	0.803421	0	0	1.46166	2.37885	0.605454	0	0	0	0	0	0.112464	0.106109	0	0	1.72905	0	0	0	0
SlERF6-4	Solyc06g053240.3.1	0.374694	0	0.423429	1.79362	0	0.151847	0.393951	0	14.8399	1.4856	2.32894	0.0582345	0	0.38116	1.53642	0.143902	11.6813	6.3696	0.794757	17.3548	0.167861	2.59085	0.914024	0.113871	0	0.430416	0	0	0	0.269058
SlERF6-7	Solyc06g065820.3.1	0.153157	0.104861	0.481455	1.08251	0	0.249418	0.991312	0.414234	2.66545	0.333979	2.25461	0.217776	0.335068	0.535527	0.933457	0.611919	0.305096	0.892524	0	0.347622	0.022255	0.424817	1.47722	0.361988	6.25144	0.352673	0	14.8824	6.17052	5.88814
SlERF3-15	Solyc03g117130.3.1	0.140802	1.30274	2.41096	0	0.23028	0.186211	0	1.42531	0.0605995	5.49233	0.58155	0.0533265	0	0.0483565	0	0.131973	4.96653	14.246	54.1738	0.836088	40.7909	0	0.0712105	0	0.0590715	0	0.910495	0	0	0.0480715
SlERF6-9	Solyc06g068360.3.1	6.01973	1.62557	8.24684	15.981	1.05406	5.18089	8.06512	25.0256	4.65418	8.89999	14.5915	0.122413	0.148631	7.37686	14.8484	1.1686	2.11926	2.21199	13.074	0.754299	16.5966	0.970822	4.47846	0.307313	11.4731	6.69502	0.748549	4.61096	4.70953	5.10868
SlERF9-10	Solyc09g091950.1.1	0	0	0	0	0	0	0	0	0	0	0	0	0	0	0	0.0287	0	0	0	0	0	0	0.050483	0.0196375	0	0	0	9.20738	9.74787	0.130128
SlERF8-5	Solyc08g008305.1.1	0.2597	0.159337	0.249571	0.175352	4.44191	0.031692	0.082521	0.672651	1.0507	2.56283	0.584529	0.168225	0.02982	0.0796665	1.13945	0.202149	0	0	0.0463585	0	0.228279	9.6738	0.462164	8.11798	1.39742	0.146112	0.427826	0.154161	0.0375915	0.263278
SlERF8-14	Solyc08g082210.4.1	3.97446	0.716263	9.07295	3.05524	34.8971	3.91159	23.1386	3.51935	6.97088	5.80621	6.57811	7.20002	68.4047	1.88827	4.35385	1.33488	0.427021	2.4192	0.305586	3.21217	0.822402	68.5013	4.11234	6.34489	1.59194	2.02838	1.16328	0.12361	0.226113	1.62225
SlERF4-6	Solyc04g054910.4.1	57.021	36.9395	25.7293	39.6468	85.6141	26.3337	29.7357	99.9189	76.6256	106.577	44.866	64.4879	22.0321	16.4964	33.4353	11.996	15.8224	7.84787	31.753	29.4881	33.245	166.273	117.564	152.009	104.386	24.1648	223.98	90.4763	89.5703	102.685
SlERF12-13	Solyc12g056980.1.1	0.283062	0.889448	14.6159	6.64137	19.2814	21.6566	2.62709	7.5746	9.19773	12.6131	2.92649	0.737318	1.18932	0.541626	2.22592	0.382597	0.470265	0.179416	0.334842	1.52786	0.730676	10.0745	18.222	12.7238	14.6272	0.532868	4.39727	34.6882	34.1303	12.759
SlERF4-9	Solyc04g072900.1.1	126.97	509.7	170.301	142.49	189.273	325.101	128.726	322.144	136.952	270.217	147.308	89.1098	128.679	95.4947	113.232	113.733	24.6001	3.224	87.8003	98.9291	55.9667	207.271	195.871	240.141	160.689	72.5811	148.099	108.532	101.996	197.607
SlERF7-4	Solyc07g054220.1.1	0.359532	0.432454	3.45786	5.05419	10.3005	1.78886	2.34255	11.1543	19.2326	11.481	4.58146	0.809925	4.08317	0.31675	3.84947	0.0826975	0.395678	0.15836	0.147539	3.53885	1.61217	17.7199	2.00555	10.1337	4.46826	0.11967	8.71975	6.68331	7.39554	12.5313
SlERF12-5	Solyc12g013660.3.1	0.0334255	0.014109	0	0.045924	0	0	0.033167	0.025268	0.0863155	0.0738775	0.033565	0	0.0337605	0.056326	0.09573	0.129678	0.0234955	0	0.081466	0.0517545	0.14789	0.0608295	0	0.111731	0	0.102183	0	0.180184	0.231161	0
SlERF4-2	Solyc04g012050.3.1	0	0.0848565	0	0.033819	0	0.021702	0	0.369105	0.101385	0.915004	0.102065	0	0	0.0583865	0.24136	0.10513	0.112848	0.329093	0.772907	0.0753555	0.592429	1.00935	0.789481	0.0771065	0.172876	0	0	1.2258	1.12269	0.146674
SlERF4-5	Solyc04g051360.3.1	0.087452	0	0	0.346869	0	0.059391	0.030923	0.022915	0.026825	0.0344395	0.160514	0.0236055	0.229318	0.095326	0.0162645	0	0.039624	0.0158895	0.080383	0.336667	0.125998	0	0	0	0	0.0318005	0	0.030633	0	0
SlERF4-7	Solyc04g071770.3.1	1.06355	16.5444	9.33679	1.78409	33.2986	8.16874	0.237491	10.7183	0.137683	2.97054	1.3231	4.57954	8.7625	0.260776	0.155181	0.0435025	29.8492	10.3562	24.4938	2.34124	33.1233	0.19401	1.21036	0.179298	1.72238	0.448852	10.7005	0.304827	0.627872	1.64485
SlERF12-12	Solyc12g056590.2.1	0.525872	38.8956	39.678	1.08285	125.642	22.3678	0.511876	110.503	1.00446	54.9557	0.114979	10.2651	11.2409	0.0304745	0.518538	0.0652715	16.9855	6.84934	17.3494	2.70793	19.5766	0.12869	0.34611	0.63707	0.799675	0.0678165	14.5183	3.4014	2.13584	0.240944
SlERF6-10	Solyc06g068830.2.1	0.158079	0.036942	0.0523775	0.0601225	0.106123	0.160559	0.143881	0.228853	0.675198	1.41585	0.3558	0.0429125	0	0	0	0	0.05858	0.168691	0	0.31952	0.0364415	0.0398185	0.044263	0.105108	0	0	0	0	0	0
SlERF3-17	Solyc03g118190.4.1	0.0734905	0.186055	0.121262	0	3.63954	0.0248025	0.148322	0.524099	0.795466	2.06776	0.287964	0.357295	6.15426	0.0966125	0.974338	0	0.114866	0.201106	1.18586	0.119285	0.786863	0.538375	1.23143	0.311383	0.103156	0	0.16741	0.400514	0.362525	0.253169
SlERF12-8	Solyc12g042210.2.1	0.0356235	0.018651	0.0423465	0	0	0	0.41523	1.18609	1.87686	5.8867	0.499553	0	0	0.104811	2.4549	0.088596	0.0591515	0.164022	0.544749	0.0505315	0.178652	0.621969	3.23658	0.110778	0.486091	0.135268	0.415256	0	0.208693	0.405908
SlERF1-16	Solyc01g108240.3.1	0.146933	0.644737	0.0626715	0.271591	2.29305	0.117274	1.5535	0.876535	2.56522	7.54446	1.79023	0.130667	0.428727	0.0539465	7.70707	0.0981535	0.0534485	0	0.634351	0.0502075	0.305728	10.9318	4.36108	5.77226	1.30552	0	0.155797	0.679902	0.823134	5.02083
SlERF10-3	Solyc10g050970.1.1	0	8.69666	0.600089	0	11.5258	0.34442	1.75981	11.5319	3.22827	25.2564	2.83851	0.111661	0.301253	0.13238	14.8441	1.20429	0.167683	0	2.32126	0.0497355	1.7557	21.1264	6.67415	12.2515	1.14661	0	0.689868	0.826563	0.942761	1.75437
SlERF1-6	Solyc01g065980.4.1	85.5599	19.944	224.885	124.611	94.0437	156.17	19.8713	16.5959	40.3131	67.7172	49.1181	386.415	197.78	100.508	80.6615	101.42	126.079	27.1902	151.877	412.132	87.4536	18.1349	9.11731	65.4912	45.187	136.471	52.3368	32.7297	22.9133	37.4322
SlERF9-6	Solyc09g075420.3.1	7.45927	50.0634	58.1393	29.0833	95.765	46.2678	26.2236	19.2851	55.5036	61.6379	51.5633	8.40051	12.7407	32.9578	25.1213	41.7018	13.93	6.9984	70.2794	47.8421	217.784	18.5324	18.5033	15.1649	13.2973	21.6333	74.1281	10.8191	9.3674	21.8852
SlERF12-10	Solyc12g049560.2.1	18.7406	9.97604	25.6793	37.3534	11.7802	30.5734	28.5422	14.4876	23.3477	22.1482	31.0944	22.2795	34.6353	62.9255	38.8623	56.5448	16.6049	5.89411	12.2212	26.9996	23.3853	14.8251	25.5548	13.0479	22.1327	84.3038	10.6028	16.4206	13.6087	22.2633
SlERF3-21	Solyc03g123500.4.1	57.4971	38.9947	64.3011	79.1061	53.9429	93.5515	57.7518	39.7588	31.1167	38.7674	50.6226	29.9474	40.0363	43.8246	35.2399	37.5856	14.5469	3.92464	93.3619	32.8766	69.231	12.6386	20.3094	18.7105	32.992	42.5427	30.9411	50.3692	43.7604	23.6878
SlERF6-6	Solyc06g063070.3.1	46.4246	257.514	220.218	109.318	353.57	165.591	77.2968	732.072	139.74	443.485	89.3353	635.244	812.011	39.6833	39.2055	41.5454	48.9058	52.0558	250.358	61.3771	155.343	101.571	300.265	232.015	339.08	38.87	265.199	130.643	130.597	308.965
SlERF3-11	Solyc03g093560.1.1	1.80283	3.05024	19.4519	22.5607	2.16701	2.25727	23.502	41.3697	163.694	80.7669	62.6744	22.6482	25.6838	6.86634	58.4227	18.4986	4.92486	3.38263	31.9547	5.16604	24.0095	197.427	309.23	118.113	65.1887	3.50001	27.8216	62.9279	72.9865	245.286
SlERF5-9	Solyc05g052040.1.1	0.707156	5.95423	7.63523	5.36874	14.9511	4.86097	5.68682	46.4079	40.9503	48.3752	12.2068	25.2964	34.8746	1.16816	6.92424	1.20004	2.80332	1.75675	13.9459	2.15914	15.2618	131.939	122.119	155.649	107.381	0.749466	22.2302	49.8087	53.069	147.798
SlERF3-10	Solyc03g093550.1.1	0.621754	0.560327	9.59128	14.0647	1.37319	0.608745	7.86766	6.42481	153.576	46.1011	34.2003	3.66145	2.74342	2.40916	19.6456	8.27569	0.117421	0.290662	11.1284	0.435473	14.3682	195.683	159.403	187.917	57.3321	0.059219	4.75982	11.3264	13.5876	116.8
SlERF3-9	Solyc03g093540.1.1	0.188013	0.169561	0	1.95222	0.467357	0.124374	1.2313	2.59718	42.8783	25.2529	4.64305	2.74663	0.849978	0	3.26194	0	0.35415	0.100246	2.98657	0.330145	5.25727	112.592	58.2661	159.698	36.0404	0.158727	14.648	3.06247	3.44247	33.8746
SlERF8-9	Solyc08g078190.2.1	2.00833	2.94829	9.15875	21.2109	8.33972	2.94443	7.69804	9.51669	77.6319	31.719	40.8736	5.67723	19.7636	8.99015	23.5112	16.8382	3.06327	1.30838	10.5869	2.73684	10.7215	75.0356	88.3534	45.2612	10.6177	1.35626	11.4363	32.7046	31.8796	48.6666
SlERF3-8	Solyc03g093530.2.1	0	0	0	0.429028	0	0	0.358435	0	0.239901	0	0	0	0	0	0	0	0	0	0	0	0	0	0.586478	0	0	0	0	0	0	0
SlERF5-8	Solyc05g052030.1.1	5.88722	3.26169	20.6368	13.6924	2.9882	33.0581	2.98415	21.5568	20.3202	82.0051	40.4	137.769	7.02905	17.7921	26.8297	13.1988	6.47827	3.72134	29.806	8.67718	23.6777	21.081	62.6824	236.08	176.847	24.2566	165.324	42.0797	35.3682	55.1411
SlERF3-1	Solyc03g005500.1.1	0	0	0	0	0	0	0	0	0	0	0	0	0	0	0	0	0	0	0	0	0	0	0	0	0	0	0	0.212372	0.201554	0
SlERF9-7	Solyc09g089910.1.1	0	0.135842	0	0.408045	0	0.523695	0	0.558217	0.114085	0.794245	0	0	0	0.101998	0.0775005	0	0	0	0	0	0	0	0.128694	1.20974	0.892169	0.150902	0.179369	0	0	0.101397
SlERF9-3	Solyc09g066340.1.1	0	0	0	0	0	0	0	0	0	0	0	0	0	0	0	0	0	0	0	0	0	0	0	0	0	0	0	0	0	0.126228
SlERF9-4	Solyc09g066350.1.1	0.517157	0	0	0	0	0	0	0	0.188085	0.362502	0.126891	0.0927205	0	0	0	0	2.28588	2.4717	0.140473	0	0.361067	0	0.212172	1.52093	0.530018	0	0.295716	1.51669	0.590522	0
SlERF3-2	Solyc03g005510.2.1	0.078525	0	0	0	0	0	0	0	0	0.469247	0	0	0	0	0	0	0	0	0	0.488415	0	0	0.0844125	0	0.292593	0	0	0	0	0
SlERF9-8	Solyc09g089920.1.1	0	0.163864	0	0	0	0.246614	0	0.380605	0	0.120106	0	0	0	0	0.067536	0.138171	0	0	0	0	0	0.128799	0.130891	0	2.41817	0	0.463197	0	0.135329	1.12452
SlERF5-6	Solyc05g051180.3.1	0	0	0	0	0.11972	0	0	0	0.180069	0	0	0	0	0.113405	0.118758	0.353854	0.243975	0.0952725	0.091268	0	0.058933	0	3.37372	0.118278	0.378259	0.270347	0	1.96857	2.47094	0.162522
SlERF11-2	Solyc11g011740.1.1	0	0	0.184702	0.205299	0	0.792103	0	0	0	0	0.0998935	0	0	0	0.10876	0	0.061263	0	0	0.0746035	0	0.095914	0	0.603727	0.0638835	0	0.112135	0.720377	0.646931	0
SlERF11-3	Solyc11g011750.1.1	0	0	0	0	0	0	0	0	0	0	0	0	0	0	0.926531	0	0	0	0	0	0	0	1.2152	0.247683	0.214467	0	0	8.6555	7.76694	0.394919
SlERF4-3	Solyc04g014530.1.1	0.0599885	0.295469	3.44845	0.877924	0.138733	0.378773	11.2942	7.12373	15.0683	10.3808	5.89779	7.47471	0	0.0505445	3.17119	0.706025	0.122472	0.0305865	0.146207	0	0.0499565	1.12757	3.78739	14.1927	5.61809	0.121921	29.92	0.964873	0.817591	1.53032
SlERF5-7	Solyc05g051200.1.1	1.02263	0.498176	0.4429	1.15711	0.0935675	0.112484	0.892342	8.64352	9.44881	17.5354	14.0745	4.99194	6.6084	0.238943	1.37875	0.0597905	0.341577	0.731198	2.99933	0.613935	3.3638	1.56365	1.04131	17.9638	4.83361	0	16.0933	11.7552	7.14034	1.69061
SlERF11-1	Solyc11g006050.1.1	0	0	0	0	0	0	0	0	0	0	0	0	0	0	0	0	0	0	0	0	0	0	0	0	0	0	0	0	0	0
SlERF9-5	Solyc09g066360.1.1	0.426377	0.924394	13.29	0.734459	3.7925	5.0669	0	5.22619	0.413919	6.40244	0.504919	12.8671	5.90188	0	0	0	0	0	0.105246	0.43936	0	0	0	12.8412	12.4407	0.083273	1.14676	0	0	1.04851
SlERF3-3	Solyc03g005520.1.1	0	0	0	0	0	0	0	0.0516325	0	0	0	0	0	0	0	0.065816	0	0	0	0	0	0	0	0.161282	0	0	0	0	0	0
SlERF9-9	Solyc09g089930.3.1	0	0.177488	1.67496	0.218606	0.750112	2.2225	0.188503	1.62441	0.148047	4.02916	1.47832	3.18869	0.105466	0.087684	0.0695685	0	0.0364475	0.058463	0	0.219895	0.279538	0.906424	0.107676	38.6769	37.4786	0.234008	78.1537	1.21072	0.516397	2.80042
SlERF2-3	Solyc02g077360.1.1	0	0.0217245	0	0	0	0	0	0.038907	0	0	0	0	0	0	0	0	0.068898	0.3485	0	0	0.085721	0	0	0	0.0431845	0	0.559509	1.71074	0.776112	0.188483
SlERF2-4	Solyc02g077370.1.1	0.207102	0.258179	0.219773	0.12214	0.096988	0.404373	0.131615	5.80184	3.09792	11.8539	0.713163	0.73591	10.8487	0	0.268548	1.08691	0.226388	1.08511	0.263163	0.355075	4.01484	3.55073	0.530075	12.9781	7.32843	0.117004	40.5745	4.63755	2.46402	3.01742
SlERF3-12	Solyc03g093610.1.1	22.0103	46.028	33.6921	22.1382	64.82	28.7999	5.89619	91.2897	51.908	60.392	16.3293	2.42978	0.718824	0.53197	2.58134	1.4475	0.375134	0.1709	0.624946	17.6369	0.43224	43.8558	154.834	16.2027	34.4581	0.173312	4.08378	65.2325	64.8221	23.0931
SlERF5-10	Solyc05g052050.1.1	8.30159	17.728	15.114	11.3628	25.3045	32.5059	13.5492	43.6618	55.043	72.8371	40.1519	103.018	68.8387	17.4693	8.41911	15.0967	6.19668	2.28385	10.4407	10.4758	27.9465	34.2811	62.8477	85.7311	112.554	21.8435	58.6723	56.2534	41.0207	32.8789
SlERF8-7	Solyc08g078170.1.1	0.0584405	0.05346	0.503824	0.365382	0.448317	0.158737	0.549175	0.088357	0.235301	0.173065	0.475166	0	0	0.370368	0.14183	0.289126	0	0	0.142434	0.0452435	0.918746	0.058167	0.270167	0	0	1.07218	0	2.98347	2.6162	0
SlERF8-8	Solyc08g078180.1.1	0	0.0545155	0.49955	0.272319	0.151225	0.437312	0.304937	0.0438195	0.331513	1.78591	0.368724	0.730302	0.65778	0.0409335	0.13452	0	0.0757725	0.0747545	0.205164	0.25059	0.664866	0.227083	0.051647	0.143141	0.17902	0.0605595	57.8042	0.717121	0.349813	0.16643
SlERF8-1	Solyc08g007230.3.1	0.669185	2.35314	6.93412	2.11192	2.68082	27.604	0.674809	0.346365	5.43042	0.872643	3.28537	0.831481	0.932748	0	0.26214	0.610829	0.310923	0.039475	0.188695	0.68518	2.18032	0.372073	0.693399	0.428484	1.00889	0.157351	0.090092	3.80268	1.11002	0.764072
SlERF1-12	Solyc01g090370.3.1	0	0	0	0	0	0	0	0	0	0	0	0	0	0	0	0	0.0414295	0	0	0	0	0	0	0	0	0	0	0	0	0
SlERF5-4	Solyc05g050790.3.1	0	0	0	0	0.286432	0	0	0.063997	0	0	0	0	0	0	0.051364	0	0	0	0	0	0	0	0.244628	0	0.071033	0	0	7.69071	6.59718	0
SlERF1-9	Solyc01g090310.3.1	0	0.05512	0	0.082785	0	0.0531245	0.0597885	0	0.375906	0	0.544558	0	0	0.165548	0.104564	0.878585	0	0.050389	0	0.068907	0	0.788166	0.0522195	0	0	0	0	0.177684	0.0630135	0
SlERF1-8	Solyc01g090300.2.1	0.140439	0	0	0.079778	0.0491155	0.161854	0.230467	0	0.04461	0	0.528544	0	0	1.36668	0.302296	4.41795	0	0	0	0	0.133993	0.82229	0.100645	0	0	0.650791	0	0.235214	0.237022	0
SlERF1-10	Solyc01g090320.4.1	0	0	0	0	0	0	0	0	0	0	0	0	0	0	0	0.288784	0	0	0	0	0	0.178736	0	0	0	0.0626195	0	0	0	0
SlERF1-11	Solyc01g090340.3.1	42.5612	0.067135	21.9108	32.3004	0.064568	5.81326	26.4501	0	15.6014	0.239563	33.9009	0	0	34.9177	31.1982	14.1324	0	0	1.15464	3.28914	0.147035	5.27366	48.0866	4.00481	2.14994	45.979	0	34.392	32.1223	2.59169
SlERF2-8	Solyc02g090790.1.1	0	0	0	0	0	0	0	0.045937	0.0537735	0.0690495	0	0	0	0.052636	0.115325	0	0.386817	0.971534	0.600097	0	79.4084	1.02437	0	0.432509	0.041414	0	0	0	0	0
SlERF2-9	Solyc02g090800.1.1	0	0.247164	0	0	0.271155	0	0	0.135931	0.142023	0.343158	0	0	0	0	1.93672	0	0.117525	0	0	0	0.854073	5.11925	1.17511	1.52934	0.155112	0	0	0.181713	0	0.173153
SlERF2-7	Solyc02g090770.1.1	0.060354	0.37918	0.322697	0	0	0.066003	0.171862	3.29565	0.0644395	2.10771	0.984557	0	0.0621045	0.897456	13.449	0.701674	0	0.132096	0.182522	0.0856115	26.5341	8.09285	6.09987	1.0591	0.489328	2.28541	0.0871135	0.312156	0.141429	0.120376
SlERF3-5	Solyc03g007460.3.1	0.34148	0.200937	24.1202	7.90489	0.0667155	2.58296	3.80982	1.0979	2.15374	3.85719	4.91913	1.11851	1.53901	4.63378	9.33081	2.02138	1.29854	0.271528	9.62485	1.58614	4.18677	2.12469	4.78873	3.67472	4.08705	4.73039	4.61864	7.49841	8.1077	3.13697
SlERF6-3	Solyc06g051840.1.1	0.475291	0	6.03884	4.79103	0.32407	0.776289	0.606961	0.301725	1.68187	0.806733	1.9894	0.201842	0.084119	0.526536	3.69829	0.1584	0.299778	0.0737645	15.9185	1.46827	4.40732	2.65948	3.07146	0.575222	3.00576	0.172021	0.356971	17.9457	16.6189	1.53983
SlERF8-13	Solyc08g081960.3.1	5.87642	0.343027	9.21445	13.039	0.620264	10.9792	15.2251	1.3531	5.17362	3.48145	17.2254	0.0270335	0.240653	17.1504	29.9636	22.0164	3.06814	0.320337	30.3793	0.964318	14.3345	3.68288	6.18687	1.65951	1.15239	14.8963	0.438152	17.4845	14.2576	1.74801
SlERF6-11	Solyc06g082590.1.1	3.49532	1.27853	10.9646	8.53351	4.14262	8.69916	5.53121	10.2979	21.882	57.1239	11.9494	34.7208	2.3541	11.3883	17.6549	7.86149	1.84623	0.544229	17.1266	7.40712	23.8509	48.6079	75.5707	89.908	104.893	13.8345	39.7275	38.4088	34.0064	75.5073
SlERF1-15	Solyc01g095500.3.1	6.62807	0.148531	10.1357	1.48149	0.113372	1.10649	1.29798	0.299813	1.23997	2.07645	2.34453	1.45894	0.033844	0.691388	2.0719	1.03917	0.066158	0	0.245001	1.3654	0.262217	0.602196	0.430821	0.02448	1.32035	1.80894	1.62089	1.31937	0.723455	0.484595
SlERF1-2	Solyc01g008880.3.1	0	0.136182	0	0.212742	0.122268	0.278552	0.153644	0.230911	0	0	0.080256	0	0.0781975	0	0	0	0.557022	0.0718475	0	3.17794	0.263313	0.217955	0	0	0	0	0	0	0.080966	0
SlERF1-4	Solyc01g014720.3.1	0	0.04156	0	0	0	0	0	0	0	0	0	0	0	0	0	0	0.715002	3.24923	0.239971	1.77215	0.334865	0	0	0	0	0	0	0	0	0
SlERF3-18	Solyc03g119580.1.1	2.39997	0.403844	3.11454	3.52779	1.14157	3.58059	1.68848	1.13714	2.17494	2.34415	2.04821	3.1589	2.45001	3.58145	1.99617	3.44149	0.320159	0.1442	1.05438	1.73313	0.650532	2.68637	2.2589	1.93219	2.47244	3.80517	3.2948	0.76572	0.7332	3.02454
SlERF5-1	Solyc05g009250.1.1	1.29973	0.972349	0.869231	1.48713	1.27728	1.42981	0.785156	1.27512	0.965536	0.870057	1.10037	1.29395	1.87981	0.952427	1.25255	1.54073	0.409062	0.657587	1.24862	2.6598	1.59593	1.02953	1.49742	0.657833	0.911854	1.39071	1.27186	1.7761	1.74927	0.996501
SlERF4-1	Solyc04g007170.3.1	6.92246	0.703525	12.0492	10.0215	1.05233	15.2768	5.3169	3.55529	9.78249	19.9254	14.1916	8.09306	1.25436	4.63205	8.33253	3.71301	1.4134	0.999166	10.2219	2.9004	15.8331	5.24331	9.27355	16.0083	36.1595	7.05571	9.81398	1.43597	1.33319	26.0336
SlERF5-2	Solyc05g009450.1.1	6.82025	0.495705	13.8187	11.8693	1.36455	10.1609	9.13314	1.22793	7.96352	5.95145	15.2467	3.83949	3.22419	14.0644	15.355	13.9529	2.70823	0.546131	22.3278	7.01457	8.82602	6.90458	5.70777	6.79835	7.09213	12.0381	7.32603	8.78994	7.54927	6.70951
SlERF3-16	Solyc03g117230.1.1	0.042958	0	0.229684	0.073208	0	0.0507735	0	0	0	0	0.32104	0	0	52.9587	0.060138	64.0125	6.34474	1.71817	16.6235	1.24969	30.2343	0	0	0	0	26.4707	0	0.111091	0.167171	0
SlERF1-7	Solyc01g067540.2.1	0	0	0	0	0	0	0	0	0	0	0.115407	0	0	85.2463	0	42.5839	0	0	0	0	0	0	0	0	0	0.038515	0	9.36905	7.74575	0.103517
SlERF4-8	Solyc04g072300.1.1	0	0	0	0	0	0	0	0	0	0	0	0	0	0.097849	0	0	0	0	0	0	0	0	0.218112	0	0	0	0	10.7224	7.70228	1.54259
SlERF11-7	Solyc11g045680.3.1	0	0.0182945	0	0	0	0	0	0	0	0	0	0	0	0	0	0	0	0	0	0	0	0	0	0	0	0	0	1.20814	0.55011	0
SlERF11-8	Solyc11g045690.3.1	0	0	0	0	0.03467	0.075194	0	0.0904065	0.0314895	0	0.041159	0.0803875	0	0.250845	0.0213915	0.662802	0.0809265	0.274213	0	0.125478	0.207667	0.081592	0.071044	0.0299445	0.027172	0.292076	0	0.171102	0.0466815	0
SlERF5-3	Solyc05g013540.1.1	0	0.0272575	0.21411	0	0	0	0.432476	0.044435	1.19062	1.43951	1.41694	0	0.0300955	24.9838	5.95599	34.3992	0.079776	0.190829	0.247828	0.0692045	0.235262	1.19982	3.77967	0	0	38.8811	0	0.0585785	0	0.116514
SlERF12-6	Solyc12g038440.1.1	0	0	0	0	0	1.2459	0	0	0	0	0	0	0	0	0	0	0	0	0	0	0	0	0	0	0	0	0	0	0	0
SlERF12-7	Solyc12g038450.1.1	0	0	0	0	0	0	0	0	0	0	0	0	0	0	0	0	0.915437	6.35118	0.928543	2.22956	3.37322	0	0	0	0	0	0	0	0	0
SlERF3-4	Solyc03g006320.1.1	6.73477	7.29599	14.3432	35.4553	2.1847	21.7572	30.281	1.91116	25.0389	8.46477	35.1722	1.73818	0.124357	28.0003	32.2541	33.8938	200.363	20.1955	12.2207	18.309	29.5445	4.70763	3.52553	2.1737	8.43428	21.4088	4.48584	0.853659	0.807288	9.33146
SlERF10-2	Solyc10g009110.1.1	25.8743	93.0494	59.0462	63.1992	220.049	20.1079	40.4094	188.412	224.59	227.857	93.081	44.3099	84.7676	9.82284	62.4367	15.6654	58.462	20.6959	74.76	51.2686	67.8512	358.632	151.478	337.926	76.1843	2.833	94.9279	77.3307	63.507	172.29
SlERF7-3	Solyc07g053740.1.1	71.1887	298.355	385.516	241.823	601.189	179.842	187.256	847.055	917.022	993.473	492.563	235.287	312.086	111.145	294.724	151.37	146.66	40.4864	463.319	64.9883	336.6	1682.41	1540.6	1005.84	401.496	49.3954	360.138	437.294	363.487	731.219
SlERF2-6	Solyc02g077840.2.1	10.5055	1.58287	36.3822	81.0253	2.70183	36.1492	9.61258	3.11918	31.7313	29.4642	48.6698	1.17708	0	340.57	72.3382	286.402	39.1316	5.07713	69.8413	3.98066	85.9052	11.4764	24.7057	16.1675	18.9793	226.788	2.26212	59.8597	48.1104	18.5141
SlERF7-2	Solyc07g049490.3.1	77.7304	169.133	51.389	52.6384	92.8483	58.1214	38.9085	76.1296	47.8663	54.5452	45.4262	81.8309	98.6945	34.6702	38.0277	30.0838	29.4993	6.4662	48.9697	59.0193	54.2848	33.4018	51.8614	45.0057	58.6025	34.1108	85.8416	88.2685	76.5383	67.1857
SlERF12-1	Solyc12g005960.3.1	27.5893	35.6501	21.2823	25.0979	27.7684	25.6746	17.9331	21.1818	16.8781	22.3782	22.1104	31.2218	29.2593	27.2029	25.725	28.8694	10.1023	3.10828	22.7221	24.0182	26.2256	31.3837	45.5782	19.9891	34.0844	31.2386	25.6848	50.5927	44.0261	48.2802
SlERF7-5	Solyc07g064890.1.1	142.058	96.0513	225.489	275.501	172.401	288.751	195.5	159.079	136.687	164.226	245.353	393.867	306.613	269.842	235.094	226.225	82.6479	18.0557	227.629	161.162	166.541	88.4597	158.597	101.969	153.104	286.418	184.26	192.388	168.298	198.617
SlERF10-1	Solyc10g006130.1.1	32.5913	107.529	73.6725	83.4979	277.004	51.0102	49.5637	249.328	286.4	238.055	134.258	68.937	204.433	57.1456	96.1499	46.8203	15.0678	4.52901	91.1365	21.583	74.8293	668.163	456.458	291.478	90.0144	35.7689	69.1622	112.649	98.9695	197.932
SlERF2-2	Solyc02g067020.1.1	0.0415515	0.017539	0	0	0.035147	0	0	0.0314115	0.035767	0	0.0417255	0	0	0	0	0.116838	0	0	0	0	0.061282	0.037809	0	0.030357	0	0	0	0.784618	0.605563	0.038681
SlERF10-6	Solyc10g078610.1.1	0.0698835	0.0365885	0	0	0	0.038212	0.0927555	0.0637375	0.107911	0.088123	0.174089	0.075331	0.290789	0.146071	0.387652	0.266355	0	0	0.217425	0	0.147404	0.122013	1.29603	0.0362195	0.231661	0.220949	0.155138	4.12052	4.77969	0.850042
SlERF10-8	Solyc10g080650.3.1	0	0.404532	0	0	0.0458805	0	0	0.041004	0	0	0	0	0	0	0	0	0.0381275	0.04536	0	0	0	0.0493555	0	0	0	0	0	0	0.051236	0
SlERF1-1	Solyc01g005630.3.1	0.322917	0	0	0	0	0.157626	0	0	0	0	0	0	0	0	0	0	0	0.204813	0	0.0461365	0	0	0	0	0	0	0	4.72323	7.05658	0
SlERF3-13	Solyc03g114440.1.1	0	0.643863	2.14713	0.0994745	0.795373	0.253651	0	0.705944	0	0	0.193608	1.75195	0.171791	0	0.0487375	0	0.250021	0.285685	0.120436	0	0.197686	0	1.09269	0	0.061908	0	3.7732	13.1001	15.1658	0.921612
SlERF1-14	Solyc01g091760.3.1	0	0	0	0	0	0	0.04381	0.0857695	0	0.0421785	0.118693	0	0	0	0	0	0	0	0.043799	0	0.0245055	0	0.352886	0	0.0506045	0	0	4.1297	4.66232	0.097121
SlERF3-19	Solyc03g119800.3.1	0	0	0	0.048238	0	0	0	0.025816	0	0.032587	0.106908	0.0344295	0	0.0241155	0.018324	0	0.282	0.0179015	0	0.040151	0.18458	0.0349455	0.035513	0	0	0	0	0.249933	0.412184	0
SlERF2-5	Solyc02g077810.1.1	0	0	0	0.097465	0	0	0	0	0	0	0	0	0	0	0	0	0.058169	0	0.446005	4.11639	0	0	0	0	0	0	0	0	0	0
SlERF2-1	Solyc02g030210.4.1	9.28533	3.35024	18.8732	19.4652	3.2411	19.036	13.4072	9.29042	10.8936	14.5726	19.4948	16.415	13.4773	20.9041	14.4723	20.9799	14.8658	6.28175	35.9937	14.6192	19.2713	10.6699	19.5766	11.5952	16.9816	24.0711	16.485	17.963	17.1726	21.0219
SlERF9-2	Solyc09g059510.3.1	12.3426	8.30247	9.92903	21.1421	4.58348	18.5801	11.2291	8.6536	13.4361	13.6646	21.5118	3.52873	4.28347	34.4599	28.3806	28.1487	4.31549	0.958107	5.61583	19.4435	5.33855	22.9875	26.0756	21.5776	16.5463	48.7987	89.2975	15.5476	19.0925	12.4127
